# Supplementary material
Source: publisher figshare collection journal article supplement (https://tandf.figshare.com/ndownloader/files/17447387)
Supplement: Supplementary file 1 [file 17447387]

**SUPPLEMENTARY MATERIALS: Isolating proactive slowing from reactive inhibitory control in heavy drinkers.**

**Method**

*Inhibitory control Tasks*


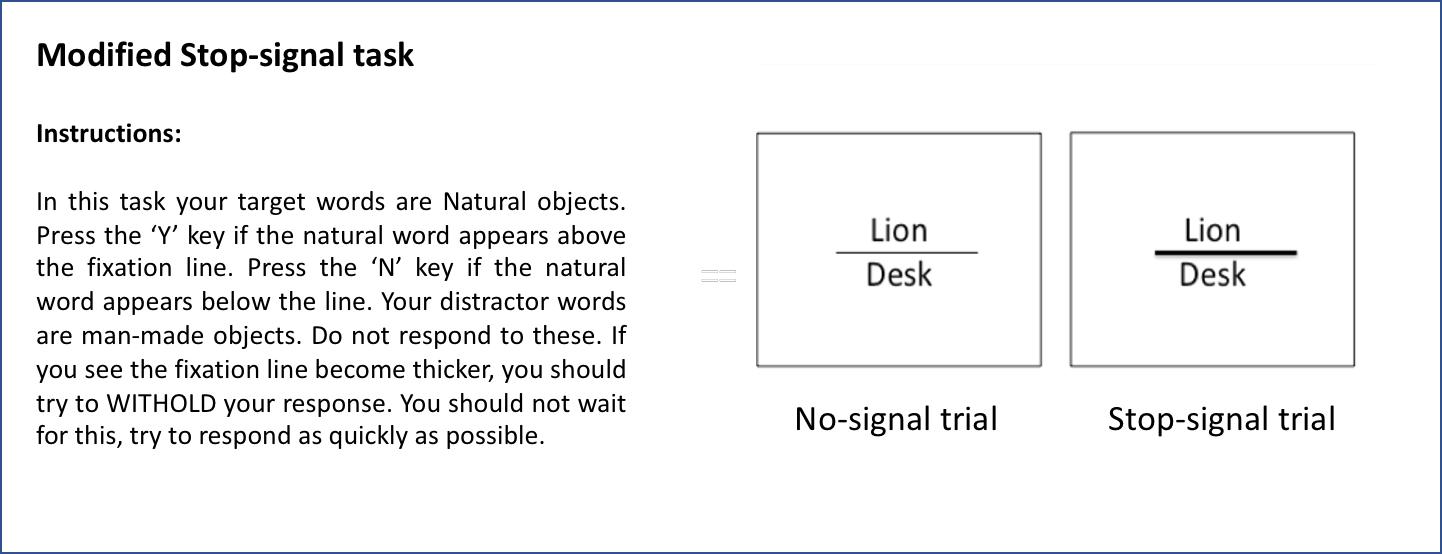
Fig 1. Task schematic of the modified SST.

Fig. 2 Task schematic of the SST-anticipation.


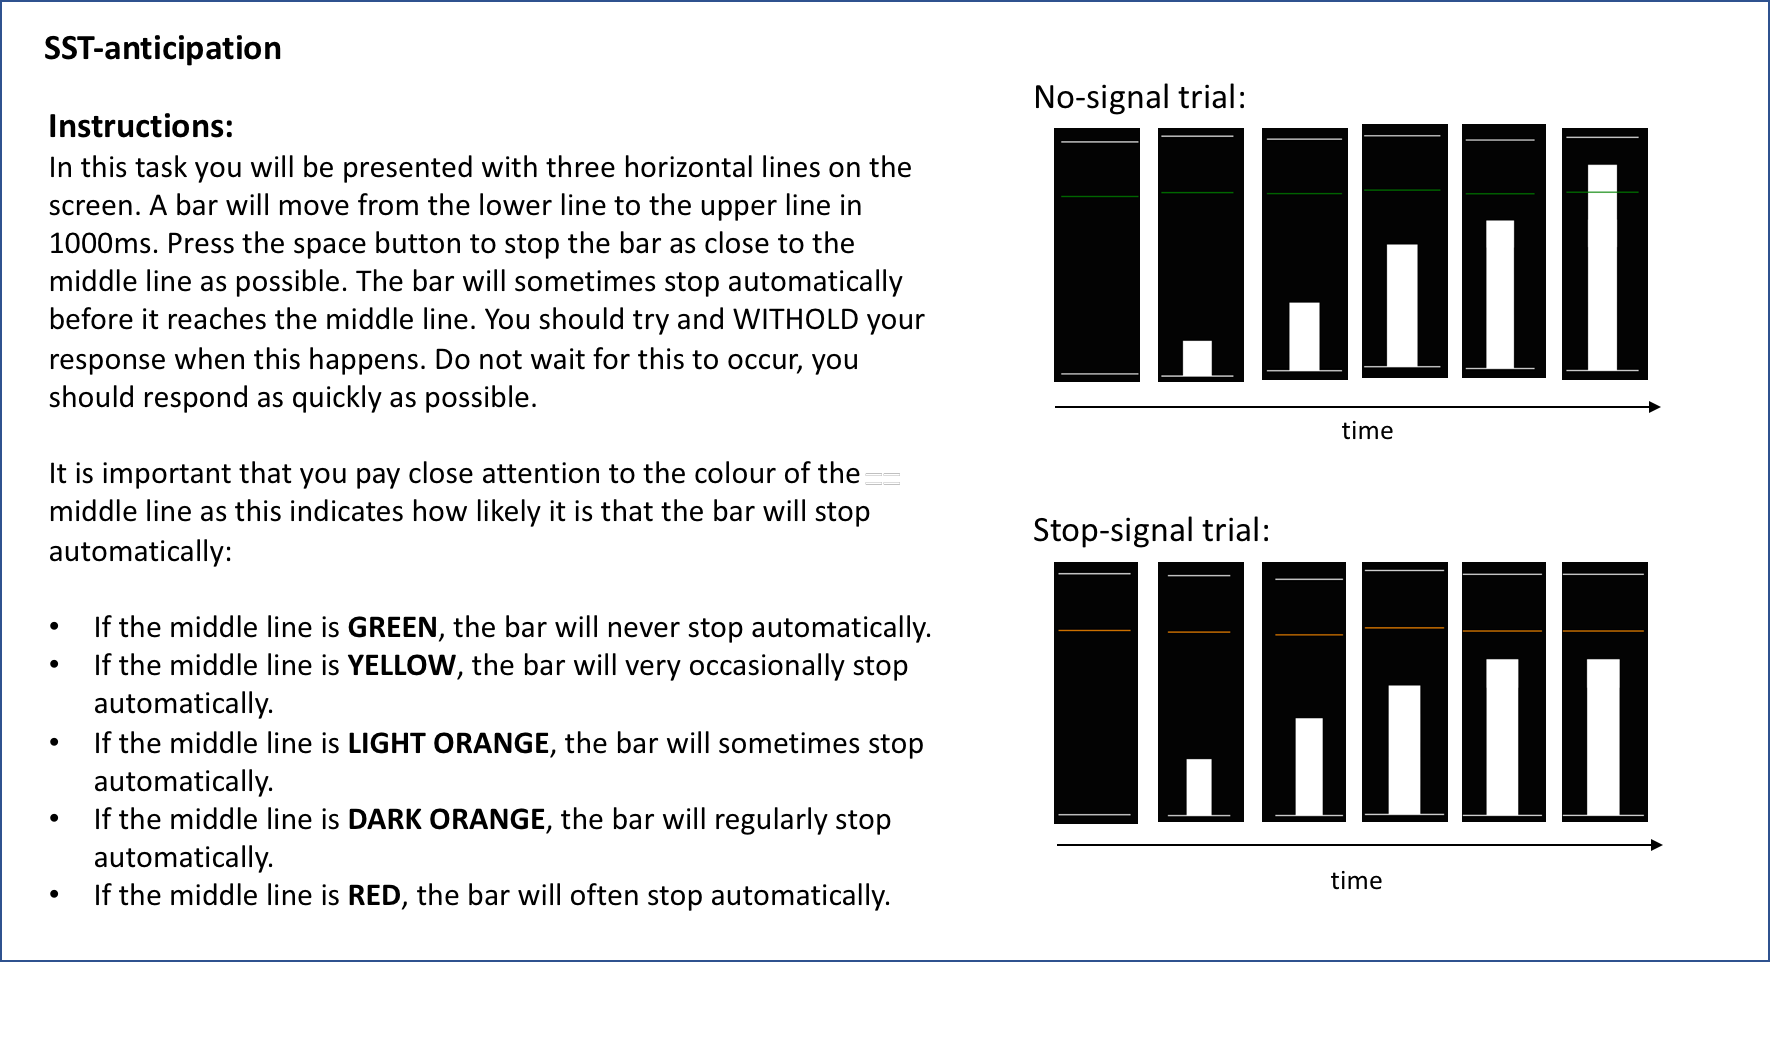


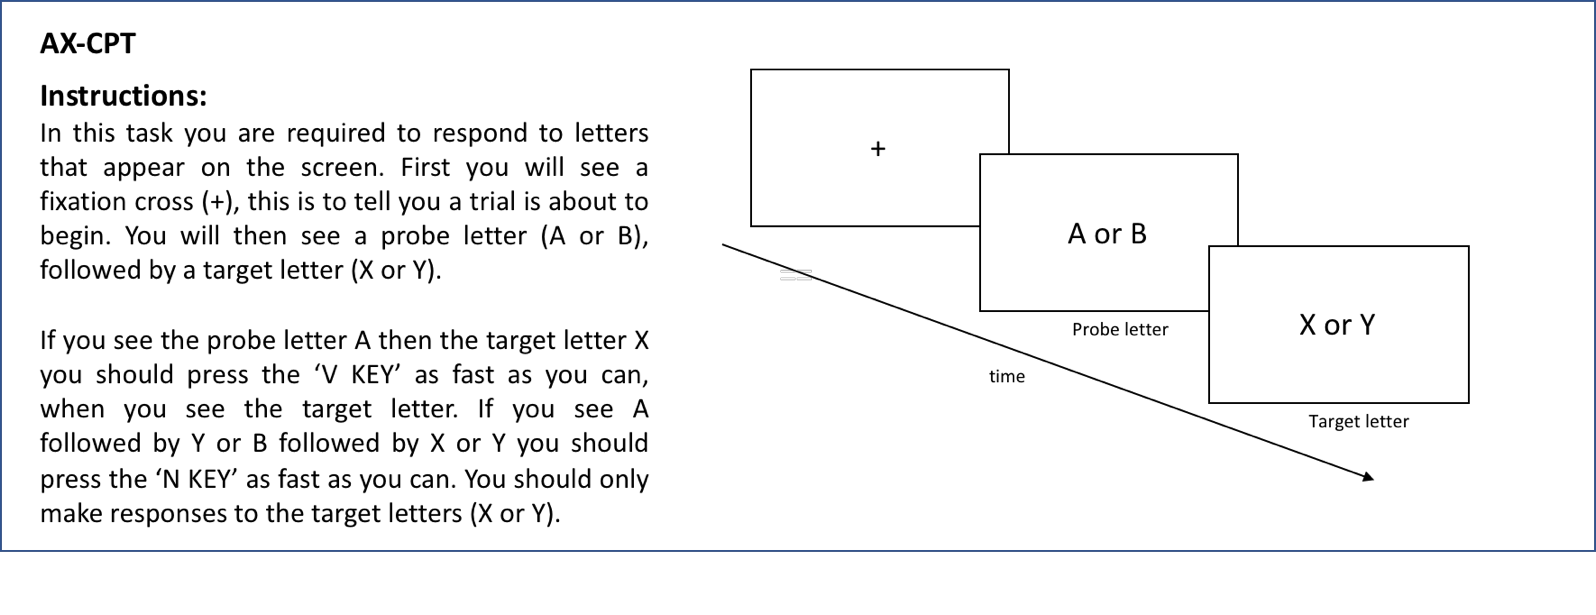
Fig. 3 Task schematic of the AX-CPT

**Results**

*Sample characteristics*

Table 1: Descriptive statistics and Pearson’s correlations between age, gender, impulsivity and inhibitory control measures.

Mean (SD) 2 3 4 5 6 7 8 9

Age 22.13 (7.99) -.17 -.11 .10 -.03 -.26 .21 -.17 -.15

Gender (M/F) 20/40 - -.14 -.27* -.26 -.03 -.02 -.22 .16

Total BIS scores 67.56 (8.58) - - .15 .17 -.16 .20 .12 .07

SSRT (Mod. SST) 391.27 (82.11) - - - .54** -.15 .13 -.06 -.14

Proactive slowing (Mod. SST) 226.28 (159.71) - - - - -.31* .28* -.11 -.10

SSRT (SST-antic.) 243.18 (49.52) - - - - - -.91** -.04 .11

Proactive slowing (SST-antic.) 46.34 (110.04) - - - - - - .06 -.17

Reactive control (AX-CPT) 4.22 (3.36) - - - - - - - -.01

Proactive slowing (AX-CPT) -30.62 (84.44) - - - - - - - -

*Total BIS scores = Total scores on Barratt Impulsivity scale. Mod. SST = modified Stop-Signal Task. SST-antic. = Stop Signal-anticipation task. AX-CPT = AX-Continuous Performance Task. *p<.05 **p<.01*

*Inhibition errors*

For the modified-SST, we ran paired samples t-tests to investigate differences in the number of incorrect responses between blocks. Participants made significantly more errors on no-signal trials in the no-signal block (6.69 ±7.96) compared to the signal block (4.37 ±5.76; *t* (53) = 3.98, p< .001, *d* = 0.33). In the signal block, participants also made significantly more errors on stop-signal trials (10.91 ±2.32) compared to no-signal trials (4.37 ±5.76; *t* (53) = -8.13, p<.001, *d* =1.49).

For the SST-anticipation task, we ran a repeated measures ANOVA to investigate differences in the number of incorrect responses as stop-signal probability increased. There was a significant main effect of stop-signal probability on the number of incorrect responses (F (2, 119) = 122.66, p<.001, ηp2 = 0.68. Participants made significantly less errors when a 17% stop-signal probability was presented (3.31 ±1.37) compared to 20% (5.88 ±1.66; p<.001), 25% (9.12 ±2.25; p<.001) and 33% stop-signal probability (10.90 ±2.69; p<.001). Participants also made significantly less errors when an 20% stop-signal probability was presented compared to a 25% (p<.001) and 33% stop-signal probability (p<.001). Lastly, participants made significantly less errors when a 25% stop-signal probability was presented compared to 33% (p= .004).

For the AX-CPT, we ran a repeated measures ANOVA to investigate differences in the number of incorrect responses between trial types. There was a significant main effect of trial type on response errors (F (2, 121) = 37.55, p< .001, ηp2 = 0.39). Participants made significantly less errors on AX trials (2.75 ±3.17) compared to AY trials (4.22 ±3.36; p= .006) but significantly more errors compared to BX (0.92 ±1.90; p< .001) and BY trials (0.71 ±1.41; p<.001). Participants also made more errors on AY trials compared to BX (p< .001) and BY trials (p< .001), however there was no significant difference between BX and BY trials (p=.273).

*The reliability of the tasks.*

To investigate the internal reliability of reaction times, we calculated Cronbach’s alpha using the split-third method. For the modified Stop-signal task, estimates ranged from .87 to .93 (see table 2). Similarly, for the SST-anticipation task,estimates for internal reliability ranged from .86 to .97 (see table 3). Lastly for the AX-CPT, estimates for internal reliability ranged from .80 to .88 (see table 4). Therefore, all measures of reaction times were above the .7 cut-off for satisfactory internal reliability (Kline, 1999).

Table 2: Internal reliability of reaction times in modified SST.

Cronbach’s alpha

No-signal block 0.93

Stop-signal block 0.89

Stop-signal block (no-signal trials) 0.87

Table 3: Internal reliability of reaction times split by stop-signal probability (0%, 17%, 20%, 25%, 33%) in the SST-anticipation.

Cronbach’s alpha

0% no-signal trials 0.96

17% no-signal trials 0.86

17% stop and no-signal trials 0.89

20% no-signal trials 0.93

20% stop and no-signal trials 0.92

25% no-signal trials 0.92

25% stop and no-signal trials 0.91

33% no-signal trials 0.97

33% stop and no-signal trials - [[1]](#footnote-1)

Table 4: Internal reliability of reaction times in the AX-CPT.

Cronbach’s alpha

AX RT 0.88

AY RT 0.80

BX RT 0.81

BY RT 0.84

*Principal Component Analysis (PCA): reactive and proactive inhibitory measures*

Lastly to investigate whether there are independent measures of inhibitory control, we conducted principal component analyses. Based on (Kaiser, 1960) we retained components that had eigenvalues of > 1. We also used a scree plot to check the maintenance of components. The Kaiser-Meyer-Olkin measure (KMO) was used to check for sampling adequacy; values of 0.5 to 0.7 are deemed acceptable, values above 0.7 are deemed good to excellent (Hutchenson & Sofroniou, 1999). Bartlett’s test of sphericity was also performed to check for adequate correlations between items. We used oblique rotation methods; specifically Oblimin rotation, when performing the PCAs based on the assumption that the factors are correlated. Lastly, since our sample size was 60, factor loadings greater than 0.7 were considered robust factor loadings (see (Stevens, 2009)).

*Proactive and Reactive inhibitory control measures in the SST-anticipation, modified SST and AX-CPT.*

Firstly, we ran a PCA to investigate if the proactive and reactive measures of inhibitory control loaded onto the same factor across all three tasks. The sampling adequacy was acceptable (KMO =0.53), and Bartlett’s test of sphericity demonstrated that correlations between items were large enough for PCA (*χ*² (15) = 90.56, p<.001). The PCA revealed three components which explained 78.37% of the variance; component one Eigenvalue = 2.28 (variance explained 37.95%), component two Eigenvalue = 1.37 (variance explained 22.79%) and component three Eigenvalue = 1.06 (variance explained 17.62%). Table 5 shows the factor loadings, following Oblimin rotation, which suggests that the proactive and reactive control measures load onto the same factor for each task. Therefore, factor one represents proactive and reactive control in the AX-CPT, although proactive slowing is not quite above the .07 threshold for robust loadings, factor two represents proactive and reactive control in the SST-anticipation and factor three represents these measures in the modified SST.

Table 5: Principal component analysis for reactive and proactive measures of inhibition in the SST-anticipation, modified SST and AX-CPT.

Rotated components

Variable Component 1 Component 2 Component 3

Reactive control (AX-CPT) -.04 -.23 **.80**

Proactive slowing (AX-CPT) -.12 -.29 -.62

SSRT (SST-antic.)  **-.98** .03 .02

Proactive slowing (SST-antic.) **.97** -.04 .08

SSRT (modified SST) -.19 **.92** .10

Proactive slowing (modified SST) .31  **.76** -.21

Factors highlighted load above 0.7 and are deemed robust factor loadings.

*Proactive and Reactive inhibitory control measures in the SST-anticipation and modified SST.*

We also decided to check the independence of these measures using only the Stop-signal tasks. The sampling adequacy was acceptable (KMO =0.55), and Bartlett’s test of sphericity demonstrated that correlations between items were large enough for PCA (*χ*² (6) = 115.84, p<.001). The PCA revealed two components which explained 86.92% of the variance; component one Eigenvalue = 2.21 (variance explained 55.24%), component two Eigenvalue = 1.27 (variance explained 31.68%). Table 6 shows the factor loadings, following Oblimin rotation. However, this suggests that factor one represents proactive and reactive control in the SST-anticipation and factor two represents proactive and reactive control in the modified SST, rather than proactive and reactive control across tasks.

Table 6: Principal component analysis for reactive and proactive measures of inhibition in the SST-anticipation and modified SST.

Rotated components

Variable Component 1 Component 2

SSRT (SST-anticipation) **-.97** -.02

Proactive slowing (SST-anticipation) **.98** -.01

SSRT (modified SST) -.10 **.92**

Proactive slowing (modified SST) .13 **.83**

Factors highlighted load above 0.7 and are deemed robust factor loadings.

References

Hutchenson, G., & Sofroniou, N. (1999). *The multivatiate social scientist*. London: Sage.

Kaiser, H. (1960). The Application of Electronic Computers to Factor Analysis. *Educational and Psychological Measurement, 20*(1), 141-151. doi: 10.1177/001316446002000116

Kline, P. (1999). *Handbook of Psychological Testing.* . London: Routledge.

Stevens, J. P. (2009). *Applied Multivariate Statistics for the Social Sciences*. New York: Routledge.

1. Too few cases to produce Cronbach’s alpha due to increased % of stop-signal trials. [↑](#footnote-ref-1)
